# Supplementary material for: Efficient Electrolytic Refining of Crude Solder Assisted by Additives in a Fluosilicic Acid System
Source: MDPI journal article supplement (doi:10.3390/ma18174122), 2025-09-02
Supplement: s1 [file materials-3754116-supplementary.pdf › materials-3754116-supplementary.pdf]

# Efficient Electrolytic Refining of Crude Solder Assisted by Additives in a Fluosilicic Acid System

Yuantao Yang <sup>1,2,#</sup>, Zhaoyi Wang <sup>1,2,#</sup>, Xuanbing Wang <sup>1,2</sup>, Wanli Xu, Haibin Yuan, Qingdong Liu, Ruidong Xu<sup>1,2,\*</sup> and Linjing Yang <sup>1,2,\*</sup>

Correspondence: rdxupaper@aliyun.com (R.X.); eslinjingyang@kust.edu.cn

## Experimental method:

The electrolyte is preheated in the electrolytic cell at a constant temperature and with a circulating liquid flow rate. Once the predetermined temperature is reached, the power supply is connected, and the cell voltage is recorded at regular intervals. The mass of the cathode sample is measured before and after the electrolytic refining process to calculate the cathode current efficiency and energy consumption. Unless otherwise specified, the electrolyte circulation rate is maintained at 50 mL/min, and the electrolytic refining duration is 4 hours. During the whole experiment, the system operates as an open system under environmental pressure.

During the electrolytic refining process, key parameters such as cathode current efficiency, cell voltage, and energy consumption are primarily investigated. Prior to the experiment, the electrolyte is preheated to the set temperature. The circulation of the electrolyte and the power supply are initiated simultaneously. The mass of the cathode plate is measured before and after the electrolytic refining to determine the cathode current efficiency and energy consumption.

Cathodes were made from refined solder plates (2.2×2.2 cm<sup>2</sup> for small-scale experiments and 10.5×11.5 cm<sup>2</sup> for scaled-up experiments), while anodes were fabricated from crude solder (2×2 cm<sup>2</sup> for small-scale experiments and 9.5×10.5 cm<sup>2</sup> for scaled-up experiments).

## Supplemental Table

Table S1. Parameter values of  $\varphi_{\text{dep}}$ ,  $\varphi_{\text{pc}}$ , and  $\varphi_{\text{CO}}$  of tin and lead deposition at different gelatin concentrations.

| GE<br>g/L | $\varphi_{\text{dep}}$<br>V | $\varphi_{\text{pc}}$<br>V | $j_{\text{pc}}$<br>mA/cm <sup>2</sup> | $\varphi_{\text{CO}}$<br>V | $\varphi_{\text{pa}}$<br>V | $j_{\text{pa}}$<br>mA/cm <sup>2</sup> |
|-----------|-----------------------------|----------------------------|---------------------------------------|----------------------------|----------------------------|---------------------------------------|
| 0.1       | −0.452                      | −0.520                     | 41.9                                  | −0.418                     | −0.332                     | 96.8                                  |
| 0.2       | −0.459                      | −0.565                     | 39.5                                  | −0.418                     | −0.337                     | 85.1                                  |
| 0.3       | −0.461                      | −0.588                     | 40.5                                  | −0.418                     | −0.341                     | 77.1                                  |
| 0.4       | −0.474                      | −0.592                     | 39.2                                  | −0.417                     | −0.343                     | 75.9                                  |
| 0.5       | −0.476                      | −0.609                     | 39.8                                  | −0.417                     | −0.347                     | 68.7                                  |

Table S2. Parameter values of  $\phi_{\text{dep}}$ ,  $\phi_{\text{pc}}$ , and  $\phi_{\text{CO}}$  of tin and lead deposition at different sodium lignosulphonate concentrations.

| SL<br>g/L | $\phi_{\text{dep}}$<br>V | $\phi_{\text{pc}}$<br>V | $j_{\text{pc}}$<br>mA/cm <sup>2</sup> | $\phi_{\text{CO}}$<br>V | $\phi_{\text{pa}}$<br>V | $j_{\text{pa}}$<br>mA/cm <sup>2</sup> |
|-----------|--------------------------|-------------------------|---------------------------------------|-------------------------|-------------------------|---------------------------------------|
| 0.1       | -0.528                   | -0.600                  | 45.6                                  | -0.488                  | -0.424                  | 61.7                                  |
| 0.2       | -0.533                   | -0.616                  | 43.7                                  | -0.487                  | -0.429                  | 47.7                                  |
| 0.3       | -0.537                   | -0.628                  | 43.6                                  | -0.487                  | -0.432                  | 40.3                                  |
| 0.4       | -0.539                   | -0.635                  | 44.2                                  | -0.487                  | -0.433                  | 36.8                                  |
| 0.5       | -0.544                   | -0.645                  | 44.8                                  | -0.483                  | -0.434                  | 28.4                                  |

Table S3. Element content of the cathode in solder electrolytic refining.

| Elements | Sn      | Pb     | Bi      | Sb      | In      | Cu      | Ni      |
|----------|---------|--------|---------|---------|---------|---------|---------|
| Content  | 74.90   | 25.08  | 0.0012  | 0.0030  | <0.0005 | <0.0005 | <0.0005 |
| Elements | Ag      | As     | Co      | Zn      | Fe      | Cd      | Al      |
| Content  | 0.00069 | 0.0019 | <0.0005 | <0.0005 | <0.0005 | <0.0005 | <0.0005 |

Table S4. Comparative analysis of MSA/H<sub>2</sub>SiF<sub>6</sub>.

|                                 | price         | saturation vapor<br>pressure/kPa | boiling point/°C | environmental impact                      |
|---------------------------------|---------------|----------------------------------|------------------|-------------------------------------------|
| MSA                             | ~RMB 10,000/t | 0.13                             | 167              | Readily biodegradable,<br>low toxicity    |
| H <sub>2</sub> SiF <sub>6</sub> | ~RMB 4,000/t  | 27.5                             | 108.5            | Fluoride waste requires<br>neutralization |

Table S5. The changes in current efficiency, cell voltage, and energy consumption without replenishment of additives.

| Electrolysis time/h | Current efficiency/% | Cell voltage/V | Energy consumption/kWh/t |
|---------------------|----------------------|----------------|--------------------------|
| 24                  | 99.01                | 0.21           | 84.83                    |
| 48                  | 98.4                 | 0.23           | 93.58                    |

Table S6. Element composition of anode slime in enlargement experiment.

| Elements | Sn    | Pb    | Bi    | Sb     | In    | Cu     | Ni     |
|----------|-------|-------|-------|--------|-------|--------|--------|
| Content  | 33.21 | 12.77 | 25.33 | 23.43  | 0.30  | 1.84   | 0.61   |
| Elements | Ag    | As    | Co    | Zn     | Fe    | Cd     | Al     |
| Content  | 0.23  | 0.26  | 0.023 | 0.0028 | 0.035 | 0.0054 | 0.0021 |

Table S7. Cathodic deposition quality, anode slime quality, and electrolyte volume during electrolysis.

| cathodic deposition quality/g | anode slime quality/g | electrolyte volume/L |
|-------------------------------|-----------------------|----------------------|
| 177.2                         | 21.6                  | 5                    |

Table S8. The distribution balance table of elements in cathode, anode slime, and electrolyte after electrolytic refining.

|    | cathode plate<br>/g | anode slime<br>/g | electrolyte<br>/g | cathode plate<br>/% | anode slime<br>/% | electrolyte<br>/% |
|----|---------------------|-------------------|-------------------|---------------------|-------------------|-------------------|
| Sn | 132.7200            | 7.1700            | 23.5000           | 81.2290             | 4.3883            | 14.3828           |
| Pb | 44.4400             | 2.7500            | 11.9000           | 75.2073             | 4.6539            | 20.1388           |
| Bi | 0.0021              | 5.4700            | 0.0009            | 0.0384              | 99.9452           | 0.0164            |
| Sb | 0.0053              | 5.0600            | 0.0077            | 0.1045              | 99.7447           | 0.1508            |
| Cu | 0.0009              | 0.3900            | --                | 0.2267              | 99.7733           | --                |
| Ag | 0.0012              | 0.0430            | --                | 2.7589              | 97.2411           | --                |
| As | 0.0033              | 0.0560            | 0.0007            | 5.5000              | 93.3333           | 1.1667            |
| In | 0.0009              | 0.0560            | 0.5500            | 0.1460              | 9.2274            | 90.6266           |
| Al | 0.0009              | 0.0005            | 0.0945            | 0.9245              | 0.4696            | 98.6060           |

## Supplemental Figures

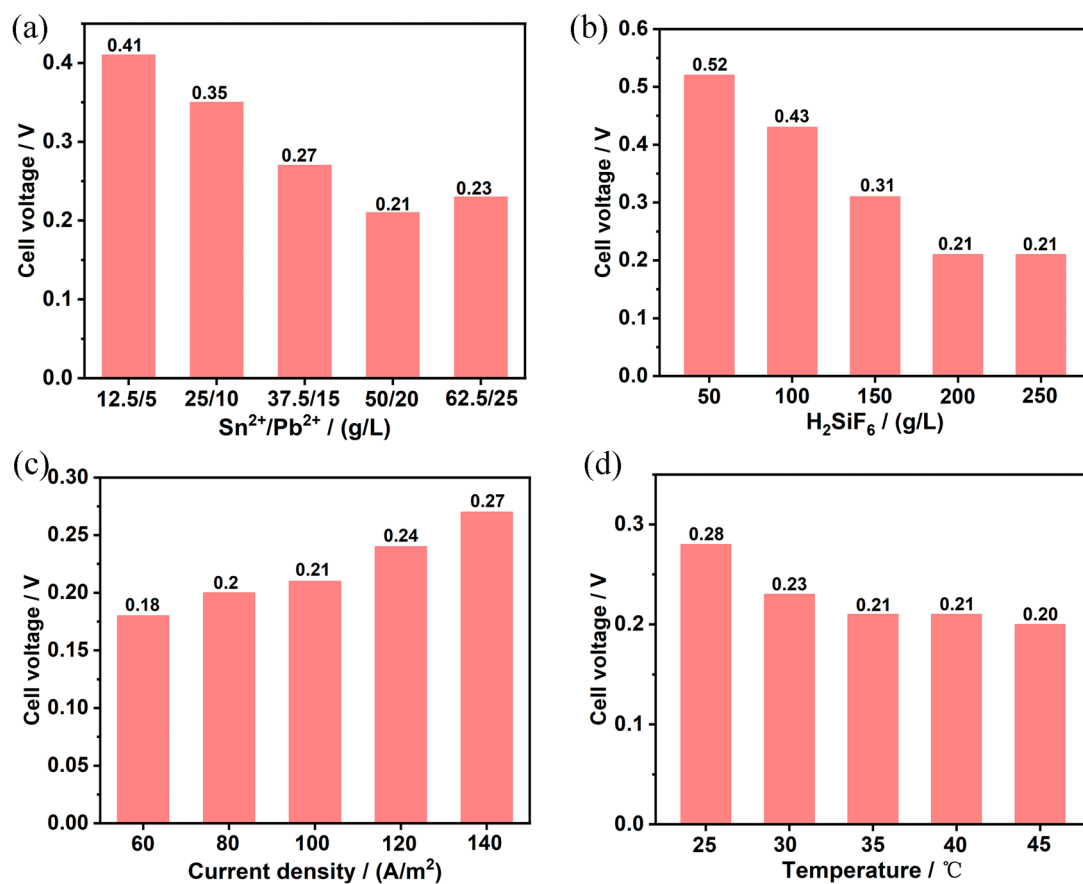

Figure S1. Cell voltage of crude solder under different conditions.

(a) Sn<sup>2+</sup>/Pb<sup>2+</sup> concentration; (b) H<sub>2</sub>SiF<sub>6</sub> concentration; (c) current density; (d) temperature.

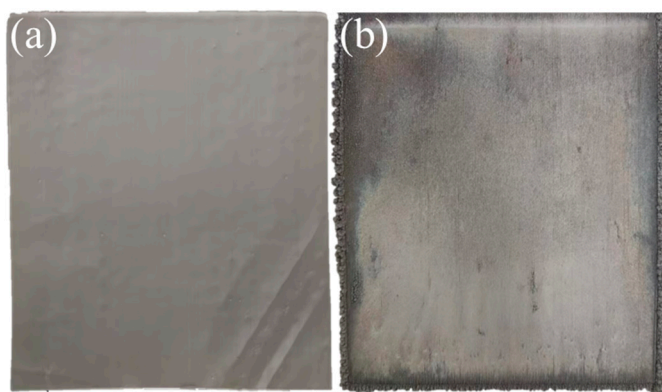

Figure S2. The morphology of the cathode surface changes with the extension of electrolysis time for (a) 24 h and (b) 48 h.

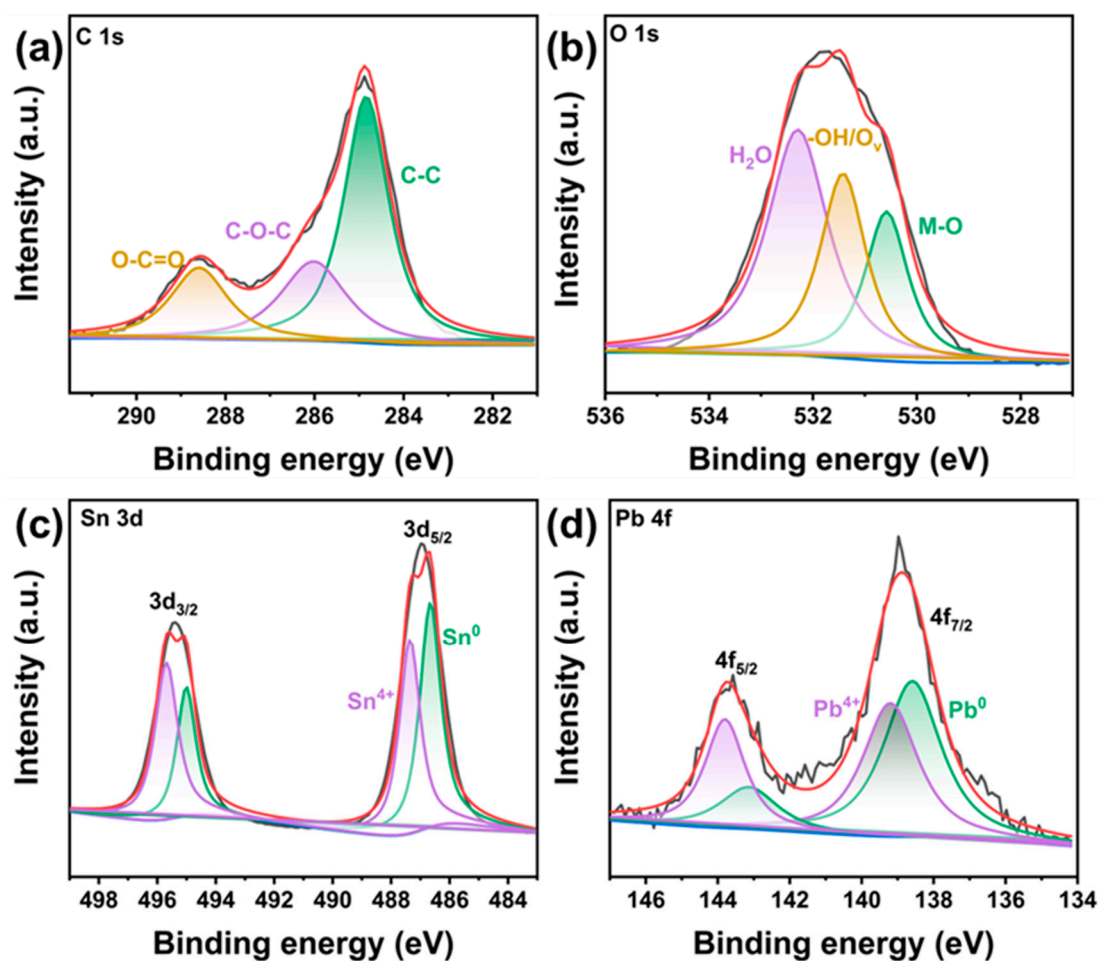

Figure S3. XPS spectra of (a) C 1s, (b) O 1s, (c) Sn 3d, and (d) Pb 4f of the cathode plate.

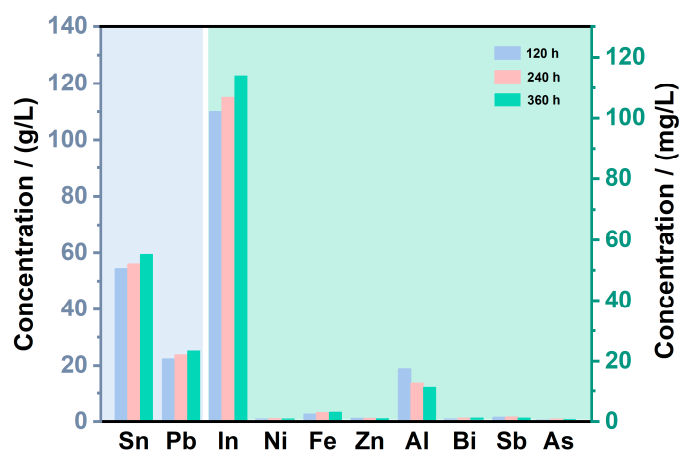

Figure S4. The composition changes of electrolytes after multiple cycles of use.

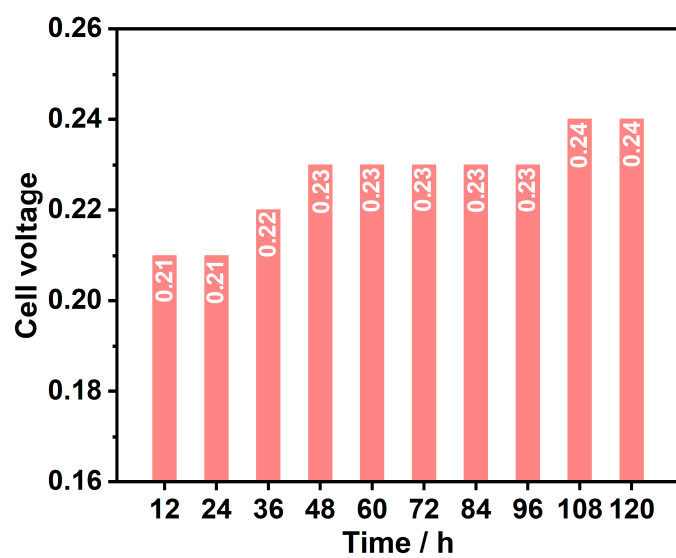

Figure S5. Variation of cell voltage with electrolysis time.
